# Supplementary material
Source: MDPI journal article supplement (https://www.mdpi.com/2311-5629/4/3/50)
Supplement: s1 [file s1]

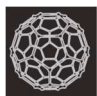

Supporting Information

# New Approach of Fabricating Graphene Nanoplates@Natural Rubber Latex Composite and Its Characteristics and Mechanical Properties

Duong Duc La <sup>1,\*</sup>, Tuan Anh Nguyen <sup>2</sup>, Viet Do Quoc <sup>3</sup>, Tham Thi Nguyen <sup>2</sup>, Duy Anh Nguyen <sup>1</sup>, Linh Nguyen Pham Duy <sup>3</sup>, Nghia Phan Trung <sup>3</sup> and Sheshanath V. Bhosale <sup>4,\*</sup>

<sup>1</sup> Department of Inorganic Chemistry, Institute of Chemistry and Materials, Hanoi 100803, Vietnam; nguyen.duy.anh0@gmail.com (D.A.N.)

<sup>2</sup> Advanced Nanomaterial Laboratory, Applied Nano Technology Joint Stock Company (ANTECH. Jsc), Hanoi 100803, Vietnam; Tuananhnguyendhb@gmail.com (T.A.N.); thamnt@nanoungdung.vn (T.T.N.)

<sup>3</sup> Institute of Chemistry Technology, Hanoi University of Science and Technology, Hanoi 100803, Vietnam; vietzat@gmail.com (V.D.Q.); masterist83@gmail.com (L.N.P.D.); david@nanoungdung.vn (N.P.T.)

<sup>4</sup> Department of Chemistry, Goa University, Goa 403206, India

\* Correspondence: duc.duong.la@gmail.com (D.D.L.); svbhosale@unigoa.ac.in (S.V.B.); Tel.: +84-167-271-2734 (D.D.L.); +91-0866-960-9303 (S.V.B.)

This provides further information about the XRD pattern, Raman and TGA spectra of GNPS and the SEM images, DSC spectrum and DMA study of obtaining graphene nanoplates/natural rubber latex composite. This material is available free of charge via the internet.

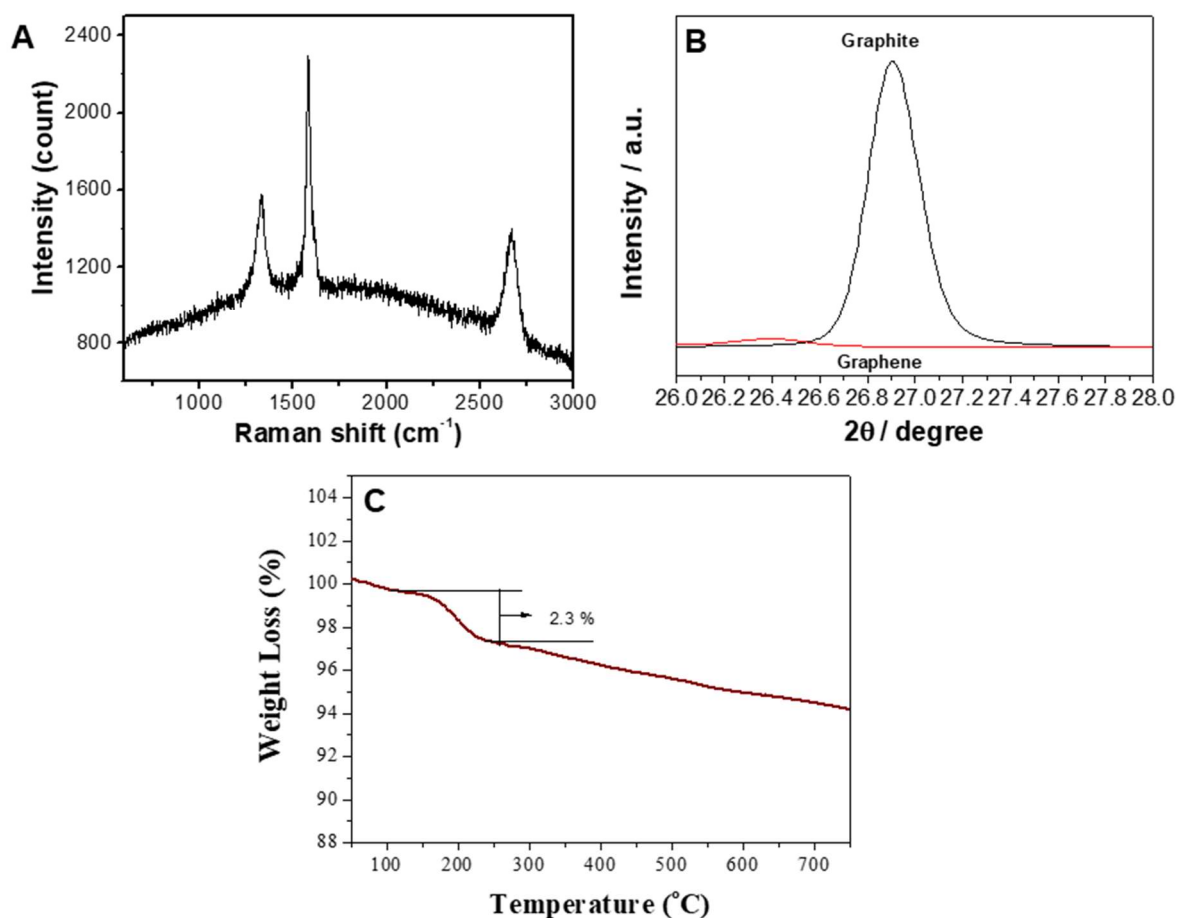

**Figure S1.** (A) Raman spectrum; (B) X-ray diffraction (XRD) pattern and (C) Thermogravimetric analysis (TGA) spectrum of graphene nanoplatelets.

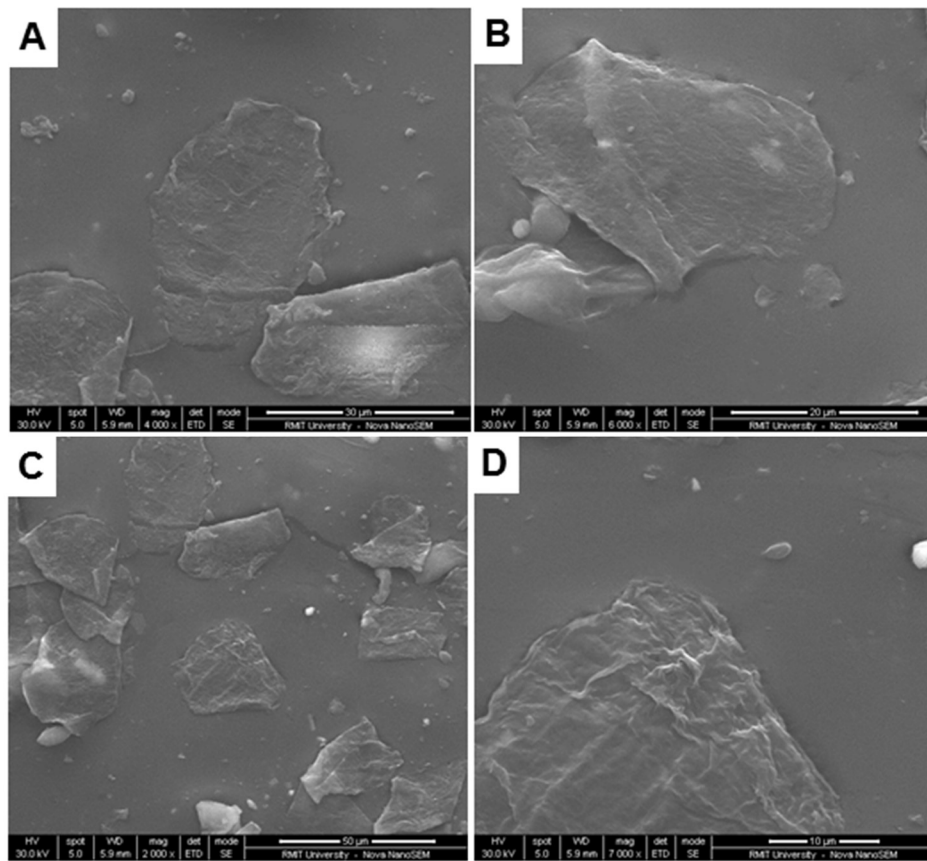

**Figure S2.** SEM images of the graphene nanoplates@natural rubber latex composite.

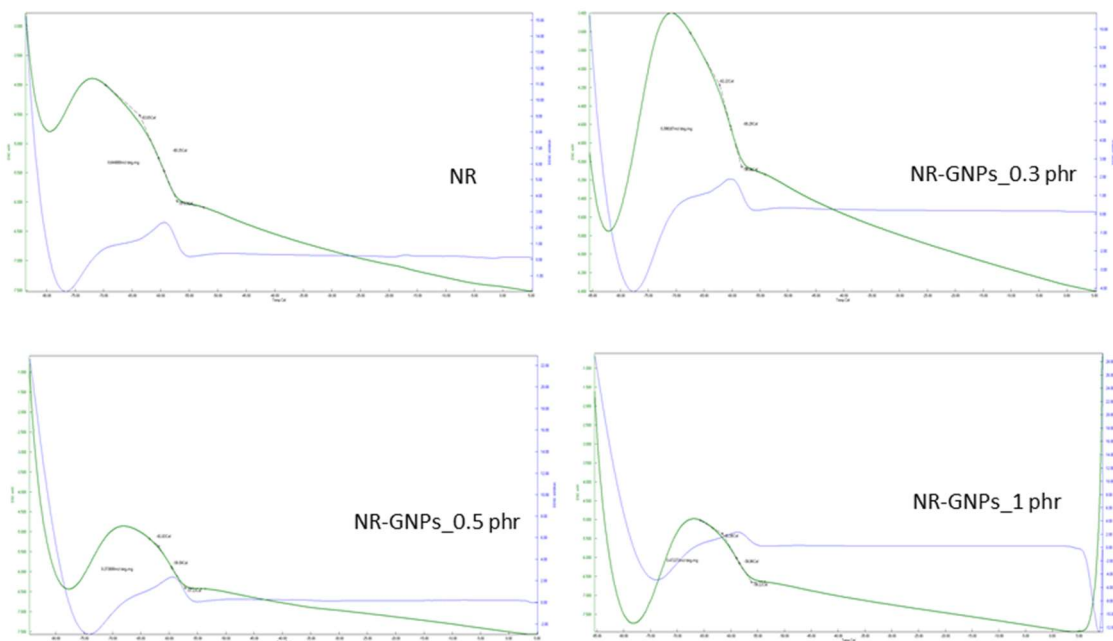

**Figure S3.** Differential scanning calorimetry (DSC) spectrum of the natural rubber and graphene nanoplatelets (GNPs)/rubber composite. Differential scanning calorimetry (purple line) and scanning calorimetry (blue line).

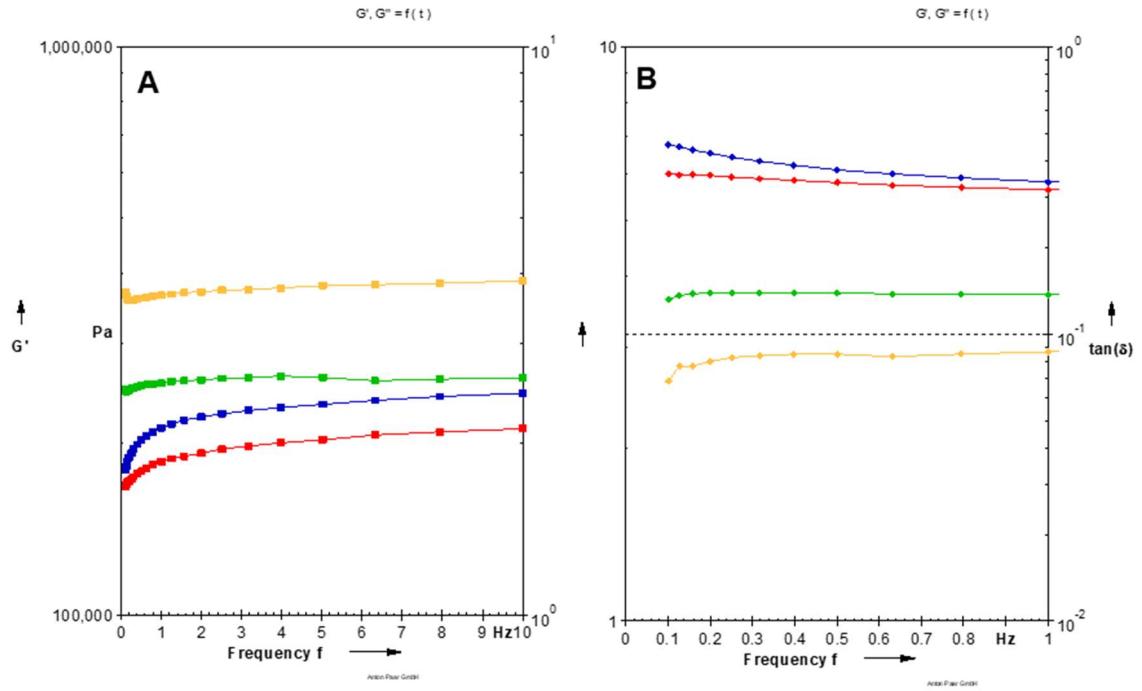

**Figure S4.** Dynamic mechanical analysis (DMA) spectra: (A) storage modulus and (B)  $\tan(\delta)$  of GNPs/rubber composites with various GNPs contents. 0.3 phr (blue line), 0.5 phr (pink line), 0.7 phr (green line), 1 phr (orange line).
